# Supplementary material
Source: PubMed Central journal article supplement (PMC3590097)

## RUNX1 mutations in cytogenetically normal acute myeloid leukemia are associated with a poor prognosis and up-regulation of lymphoid genes

Philipp A. Greif,<sup>1,2</sup> Nikola P. Konstandin,<sup>1,2</sup> Klaus H. Metzeler,<sup>1</sup> Tobias Herold,<sup>1</sup> Zlatana Pasalic,<sup>1</sup> Bianka Ksienzyk,<sup>1</sup> Annika Dufour,<sup>1</sup> Friederike Schneider,<sup>1</sup> Stephanie Schneider,<sup>1</sup> Purvi M. Kakadia,<sup>1,2,7</sup> Jan Braess,<sup>3</sup> Maria Cristina Sauerland,<sup>4</sup> Wolfgang E. Berdel,<sup>5</sup> Thomas Büchner,<sup>5</sup> Bernhard J. Woermann,<sup>6</sup> Wolfgang Hiddemann,<sup>1,2</sup> Karsten Spiekermann,<sup>1,2</sup> and Stefan K. Bohlander<sup>1,2,7</sup>

<sup>1</sup>Department of Internal Medicine 3, Ludwig-Maximilians-Universität (LMU) Munich, Munich; <sup>2</sup>Clinical Cooperative Group 'Leukemia', Helmholtz Zentrum München, German Research Center for Environmental Health, Munich; <sup>3</sup>Oncology and Hematology, St. John-of-God Hospital, Regensburg; <sup>4</sup>Institute of Biostatistics and Clinical Research; <sup>5</sup>Department of Medicine A-Hematology, Oncology and Pneumology, Universität Münster, Münster; <sup>6</sup>German Society of Hematology and Oncology, Berlin; and <sup>7</sup>Center for Human Genetics, Philipps Universität, Marburg, Germany

*Citation: Greif PA, Konstandin NP, Metzeler KH, Herold T, Pasalic Z, Ksienzyk B, Dufour A, Schneider F, Schneider S, Kakadia PM, Braess J, Sauerland MC, Berdel WE, Büchner T, Woermann BJ, Hiddemann W, Spiekermann K, and Bohlander SK. RUNX1 mutations in cytogenetically normal acute myeloid leukemia are associated with a poor prognosis and up-regulation of lymphoid genes. Haematologica 2012;97(12):1909-1915. doi:10.3324/haematol.2012.064667*

### Online Supplementary Table S1. Primers targeting the coding exons of RUNX1.

cDNA sequence: uc010gmu.1 (NM\_001754.4)

Genomic sequence: hg18\_chr21:35080967-35344437\_rev

| NAME           | LEFT PRIMER             | NAME           | RIGHT PRIMER            | PRODUCT SIZE |
|----------------|-------------------------|----------------|-------------------------|--------------|
| RUNX1-exon 2F  | GTCTTGTTTTTCGCTCCG      | RUNX1-exon 2R  | CATTTTCATTACAGGCAAAGCTG | 197          |
| RUNX1-exon 3F  | AACCACGTGCATAAGGAACAG   | RUNX1-exon 3R  | GCAGAAACAGCCTTAATTATTGG | 363          |
| RUNX1-exon 4F  | TGGTAGGAGCTGTTGCAGG     | RUNX1-exon 4R  | CATCCCAAGCTAGGAAGACC    | 459          |
| RUNX1-exon 5F  | TCACTACACAAATGCCCTAAAAG | RUNX1-exon 5R  | TTGAAATGTGGGTTTGTTC     | 292          |
| RUNX1-exon 6F  | AGATATGTTTCAGGCCACCAAC  | RUNX1-exon 6R  | TCTGAGACATGGTCCCTGAG    | 243          |
| RUNX1-exon 7F  | AAGAAAAGCCCAAGTTTTAGG   | RUNX1-exon 7R  | AGTTGGTCTGGGAAGGTGTG    | 387          |
| RUNX1-exon 8F  | GAACAAGGGCCACTCATTTTC   | RUNX1-exon 8R  | TGGACCTTCCACCCAG        | 301          |
| RUNX1-exon 9F  | CTCCGCAACCTCCTACTCAC    | RUNX1-exon 9Ra | CCCACCATGGAGAACTGGTA    | 342          |
| RUNX1_exon_9Fa | CACGCGCTACCACACCTAC     | RUNX1-exon_9R  | CCTGACCTACAGCGAGATCC    | 484          |

**Online Supplementary Table S2.** List of probe sets differentially expressed in *RUNX1*-mutated (n=15) versus *RUNX1*-wild-type (n=26) CN-AML patients. The analysis was restricted to *NPM1*-wild-type patients. 85 probe sets out of 17109 were significant (q value<0.05). The P value of a global test for difference between the two groups was 0.03.

| Microarray probe set | Gene symbol | Gene name                                                                               | Fold change:<br><i>RUNX1</i> -mutated vs.<br><i>RUNX1</i> -wild type | q value |
|----------------------|-------------|-----------------------------------------------------------------------------------------|----------------------------------------------------------------------|---------|
| GC04M057210_at       | HOPX        | HOP homeobox                                                                            | 4,10                                                                 | 0,0079  |
| GC10P098054_at       | DNTT        | deoxynucleotidyltransferase, terminal                                                   | 3,38                                                                 | 0,0231  |
| GC08P026491_at       | DPYSL2      | dihydropyrimidinase-like 2                                                              | 2,71                                                                 | 0,0122  |
| GC01P026516_at       | CD52        | CD52 molecule                                                                           | 2,67                                                                 | 0,0114  |
| GC14P105461_at       | KIAA0125    | KIAA0125                                                                                | 2,65                                                                 | 0,0079  |
| GC01P078858_at       | IFI44L      | interferon-induced protein 44-like                                                      | 2,63                                                                 | 0,0301  |
| GC10M097941_at       | BLNK        | B-cell linker                                                                           | 2,58                                                                 | 0,0151  |
| GC06M006089_at       | F13A1       | coagulation factor XIII, A1 polypeptide                                                 | 2,51                                                                 | 0,0182  |
| GC07M047281_at       | TNS3        | tensin 3                                                                                | 2,46                                                                 | 0,0079  |
| GC12P092466_at       | SOC52       | suppressor of cytokine signaling 2                                                      | 2,40                                                                 | 0,0127  |
| GC04M122868_at       | ANXA5       | annexin A5                                                                              | 2,39                                                                 | 0,0315  |
| GC05P135392_at       | TGFB1       | transforming growth factor, beta-induced, 68kDa                                         | 2,29                                                                 | 0,0273  |
| GC10M015294_at       | FAM171A1    | family with sequence similarity 171, member A1                                          | 2,23                                                                 | 0,0079  |
| GC21P041720_at       | MX1         | myxovirus (influenza virus) resistance 1, interferon-inducible protein p78 (mouse)      | 2,14                                                                 | 0,0278  |
| GC08P104222_at       | BAALC       | brain and acute leukemia, cytoplasmic                                                   | 2,14                                                                 | 0,0122  |
| GC11M000602_at       | IRF7        | interferon regulatory factor 7                                                          | 2,13                                                                 | 0,0231  |
| GC07P093388_at       | NGG11       | guanine nucleotide binding protein (G protein), gamma 11                                | 2,09                                                                 | 0,0118  |
| GC11P000303_at       | IFITM1      | interferon induced transmembrane protein 1 (9-27)                                       | 2,09                                                                 | 0,0262  |
| GC12M044867_at       | SLC38A1     | solute carrier family 38, member 1                                                      | 2,08                                                                 | 0,0251  |
| GC07P079602_at       | GNAI1       | guanine nucleotide binding protein (G protein), alpha inhibiting activity polypeptide 1 | 2,07                                                                 | 0,0231  |
| GC01M152220_at       | RAB13       | RAB13, member RAS oncogene family                                                       | 2,01                                                                 | 0,0452  |
| GC18M051045_at       | TCF4        | transcription factor 4                                                                  | 2,00                                                                 | 0,0120  |
| GC04P110700_at       | CCDC109B    | coiled-coil domain containing 109B                                                      | 1,99                                                                 | 0,0150  |
| GC07P150015_at       | GIMAP2      | GTPase, IMAP family member 2                                                            | 1,99                                                                 | 0,0164  |
| GC03M152412_at       | P2RY14      | purinergic receptor P2Y, G-protein coupled, 14                                          | 1,96                                                                 | 0,0216  |
| GC04P156807_at       | GUCY1A3     | guanylate cyclase 1, soluble, alpha 3                                                   | 1,96                                                                 | 0,0153  |
| GC03M015700_at       | ANKRD28     | ankyrin repeat domain 28                                                                | 1,93                                                                 | 0,0251  |
| GC01M089345_at       | GBP2        | guanylate binding protein 2, interferon-inducible                                       | 1,93                                                                 | 0,0158  |
| GC07M149953_at       | GIMAP6      | GTPase, IMAP family member 6                                                            | 1,92                                                                 | 0,0315  |
| GC18M020895_at       | ZNF521      | zinc finger protein 521                                                                 | 1,91                                                                 | 0,0496  |
| GC10U900364_at       | LOC283070   | hypothetical LOC283070                                                                  | 1,89                                                                 | 0,0153  |
| GC15P020444_at       | CYFIP1      | cytoplasmic FMR1 interacting protein 1                                                  | 1,87                                                                 | 0,0301  |
| GC07M139370_at       | PARP12      | poly (ADP-ribose) polymerase family, member 12                                          | 1,84                                                                 | 0,0114  |
| GC13M042358_at       | EPSTI1      | epithelial stromal interaction 1 (breast)                                               | 1,83                                                                 | 0,0496  |
| GC01P012161_at       | TNFRSF1B    | tumor necrosis factor receptor superfamily, member 1B                                   | 1,81                                                                 | 0,0493  |
| GC06P116708_at       | DSE         | dermatan sulfate epimerase                                                              | 1,79                                                                 | 0,0153  |
| GC09M025668_at       | TUSC1       | tumor suppressor candidate 1                                                            | 1,79                                                                 | 0,0150  |
| GC02P237143_at       | CXCR7       | chemokine (C-X-C motif) receptor 7                                                      | 1,77                                                                 | 0,0122  |
| GC15P086983_at       | ISG20       | interferon stimulated exonuclease gene 20kDa                                            | 1,77                                                                 | 0,0363  |
| GC18P040535_at       | SETBP1      | SET binding protein 1                                                                   | 1,76                                                                 | 0,0079  |
| GC22P049402_at       | SHANK3      | SH3 and multiple ankyrin repeat domains 3                                               | 1,76                                                                 | 0,0150  |
| GC02M165652_at       | SCN3A       | sodium channel, voltage-gated, type III, alpha subunit                                  | 1,76                                                                 | 0,0311  |
| GC14M105389_at       | IGHM        | immunoglobulin heavy constant mu                                                        | 1,75                                                                 | 0,0394  |
| GC01M089290_at       | GBP1        | guanylate binding protein 1, interferon-inducible, 67kDa                                | 1,75                                                                 | 0,0466  |
| GC14M094943_at       | C14orf139   | chromosome 14 open reading frame 139                                                    | 1,74                                                                 | 0,0127  |
| GC06P032649_at       | HLA-DQA1    | major histocompatibility complex, class II, DQ alpha 1                                  | 1,74                                                                 | 0,0420  |
| GC05M088051_at       | MEF2C       | myocyte enhancer factor 2C                                                              | 1,71                                                                 | 0,0153  |
| GC0XP135057_at       | FHL1        | four and a half LIM domains 1                                                           | 1,71                                                                 | 0,0114  |
| GC08P030361_at       | RBPMS       | RNA binding protein with multiple splicing                                              | 1,70                                                                 | 0,0122  |
| GC21P041655_at       | MX2         | myxovirus (influenza virus) resistance 2 (mouse)                                        | 1,69                                                                 | 0,0390  |
| GC05M149413_at       | CSF1R       | colony stimulating factor 1 receptor                                                    | 1,69                                                                 | 0,0479  |
| GC22M026704_at       | TTC28       | tetratricopeptide repeat domain 28                                                      | 1,69                                                                 | 0,0079  |
| GC16M087468_at       | CBFA2T3     | core-binding factor, runt domain, alpha subunit 2; translocated to, 3                   | 1,66                                                                 | 0,0284  |
| GC04M025425_at       | KIAA0746    | KIAA0746 protein                                                                        | 1,64                                                                 | 0,0301  |
| GC07P043764_at       | BLVRA       | biliverdin reductase A                                                                  | 1,64                                                                 | 0,0301  |
| GC07M149094_at       | ZNF467      | zinc finger protein 467                                                                 | 1,64                                                                 | 0,0280  |
| GC07P149842_at       | GIMAP7      | GTPase, IMAP family member 7                                                            | 1,62                                                                 | 0,0311  |
| GC04P113286_at       | C4orf32     | chromosome 4 open reading frame 32                                                      | 1,61                                                                 | 0,0479  |
| GC02M037389_at       | PRKD3       | protein kinase D3                                                                       | 1,59                                                                 | 0,0448  |
| GC10P114700_at       | TCF7L2      | transcription factor 7-like 2 (T-cell specific, HMG-box)                                | 1,59                                                                 | 0,0273  |
| GC08M141737_at       | PTK2        | PTK2 protein tyrosine kinase 2                                                          | 1,58                                                                 | 0,0079  |
| GC09M138039_at       | NACC2       | NACC family member 2, BEN and BTB (POZ) domain containing                               | 1,58                                                                 | 0,0388  |
| GC04M140646_at       | SETD7       | SET domain containing (lysine methyltransferase) 7                                      | 1,57                                                                 | 0,0270  |
| GC07M076779_at       | PION        | pigeon homolog (Drosophila)                                                             | 1,57                                                                 | 0,0264  |
| GC02M060589_at       | BCL11A      | B-cell CLL/lymphoma 11A (zinc finger protein)                                           | 1,56                                                                 | 0,0210  |
| GC01P221966_at       | CAPN2       | calpain 2, (m/II) large subunit                                                         | 1,55                                                                 | 0,0301  |
| GC18P027332_at       | DSG2        | desmoglein 2                                                                            | 1,54                                                                 | 0,0420  |
| GC0XM109724_at       | CHRD1L      | chordin-like 1                                                                          | 1,53                                                                 | 0,0401  |
| GC02M001606_at       | PXDN        | peroxidasin homolog (Drosophila)                                                        | 1,53                                                                 | 0,0374  |
| GC07M150272_at       | KCNH2       | potassium voltage-gated channel, subfamily H (eag-related), member 2                    | 0,65                                                                 | 0,0420  |
| GC12M000543_at       | NINJ2       | ninjurin 2                                                                              | 0,65                                                                 | 0,0231  |
| GC16M019422_at       | GDE1        | glycerophosphodiester phosphodiesterase 1                                               | 0,64                                                                 | 0,0479  |
| GC13M102219_at       | C13orf27    | chromosome 13 open reading frame 27                                                     | 0,63                                                                 | 0,0463  |
| GC10M119033_at       | PDZD8       | PDZ domain containing 8                                                                 | 0,60                                                                 | 0,0322  |
| GC02P047425_at       | EPCAM       | epithelial cell adhesion molecule                                                       | 0,57                                                                 | 0,0394  |
| GC01P117860_at       | FAM46C      | family with sequence similarity 46, member C                                            | 0,56                                                                 | 0,0278  |
| GC11P034417_at       | CAT         | catalase                                                                                | 0,52                                                                 | 0,0153  |
| GC12M115961_at       | TESC        | tescalcin                                                                               | 0,52                                                                 | 0,0122  |
| GC03P112743_at       | CD96        | CD96 molecule                                                                           | 0,52                                                                 | 0,0311  |
| GC11P017255_at       | NUCB2       | nucleobindin 2                                                                          | 0,45                                                                 | 0,0122  |
| GC11P065405_at       | CTSW        | cathepsin W                                                                             | 0,41                                                                 | 0,0114  |
| GC14P020429_at       | RNASE3      | ribonuclease, RNase A family, 3 (eosinophil cationic protein)                           | 0,37                                                                 | 0,0432  |
| GC22M022239_at       | IGLL1       | immunoglobulin lambda-like polypeptide 1                                                | 0,36                                                                 | 0,0311  |
| GC14M024112_at       | CTSG        | cathepsin G                                                                             | 0,30                                                                 | 0,0231  |
| GC17M053702_at       | MPO         | myeloperoxidase                                                                         | 0,29                                                                 | 0,0127  |

**Online Supplementary Table S3.** Gene set enrichment analysis, identifying sets of functionally related genes that are enriched in CN-AML patients with (n=15) or without (n=26) *RUNX1* mutations.

This analysis used the curated 'canonical pathways' (c2:cp) collection of the Molecular Signatures Database, version 3.0, available online at <http://www.broadinstitute.org/gsea/msig>. Only gene sets comprising between 15 and 200 individual genes (654 of the 880 total gene sets) were included in the analysis. Gene sets were considered significant at a false discover 128 gene sets were significant: 71 were enriched in *RUNX1*-mut patients and 51 in *RUNX1*-wt patients.

**A) Gene sets enriched in *RUNX1*-mut patients compared to *RUNX1*-wt**

| Gene Set Name                                                                 | No. of Genes in Gene Set | Normalized Enrichment Score | Nominal p Value | FDR q Value |
|-------------------------------------------------------------------------------|--------------------------|-----------------------------|-----------------|-------------|
| BIOCARTA_EDG1_PATHWAY                                                         | 27                       | 1,97                        | <.0001          | 0,057       |
| BIOCARTA_BCR_PATHWAY                                                          | 34                       | 1,96                        | 0,001           | 0,034       |
| REACTOME_TOLL_LIKE_RECEPTOR_4_CASCADE                                         | 28                       | 1,95                        | 0,001           | 0,025       |
| REACTOME_TOLL_RECEPTOR_CASCADES                                               | 83                       | 1,94                        | <.0001          | 0,022       |
| BIOCARTA_CALCINEURIN_PATHWAY                                                  | 18                       | 1,94                        | <.0001          | 0,018       |
| REACTOME_PROTEOLYTIC_CLEAVAGE_OF_SNARE_COMPLEX_PROTEINS                       | 15                       | 1,94                        | <.0001          | 0,015       |
| KEGG_INTESTINAL_IMMUNE_NETWORK_FOR_IGA_PRODUCTION                             | 38                       | 1,89                        | <.0001          | 0,026       |
| REACTOME_MYD88_CASCADE                                                        | 19                       | 1,89                        | 0,001           | 0,025       |
| REACTOME_SIGNALING_BY_BMP                                                     | 22                       | 1,89                        | 0,003           | 0,023       |
| REACTOME_INNATE_IMMUNITY_SIGNALING                                            | 103                      | 1,89                        | <.0001          | 0,021       |
| REACTOME_BOTULINIUM_NEUROTOXICITY                                             | 17                       | 1,88                        | 0,002           | 0,019       |
| REACTOME_TOLL_LIKE_RECEPTOR_9_CASCADE                                         | 23                       | 1,88                        | <.0001          | 0,018       |
| BIOCARTA_MEF2D_PATHWAY                                                        | 18                       | 1,87                        | 0,002           | 0,020       |
| KEGG_GAP_JUNCTION                                                             | 84                       | 1,86                        | 0,0004          | 0,022       |
| ST_GA12_PATHWAY                                                               | 22                       | 1,85                        | <.0001          | 0,021       |
| REACTOME_PLATELET_ACTIVATION_TRIGGERS                                         | 56                       | 1,85                        | 0,0005          | 0,020       |
| BIOCARTA_CXCR4_PATHWAY                                                        | 24                       | 1,84                        | 0,002           | 0,023       |
| SA_B_CELL_RECEPTOR_COMPLEXES                                                  | 24                       | 1,81                        | 0,002           | 0,030       |
| BIOCARTA_PAR1_PATHWAY                                                         | 37                       | 1,81                        | 0,002           | 0,031       |
| KEGG_TIGHT_JUNCTION                                                           | 127                      | 1,81                        | <.0001          | 0,029       |
| BIOCARTA_VEGF_PATHWAY                                                         | 28                       | 1,80                        | 0,003           | 0,029       |
| BIOCARTA_TH1TH2_PATHWAY                                                       | 18                       | 1,79                        | 0,002           | 0,031       |
| BIOCARTA_PGC1A_PATHWAY                                                        | 22                       | 1,79                        | 0,003           | 0,030       |
| KEGG_ALLOGRAFT_REJECTION                                                      | 25                       | 1,79                        | 0,003           | 0,030       |
| BIOCARTA_BIOPEPTIDES_PATHWAY                                                  | 42                       | 1,78                        | 0,001           | 0,032       |
| BIOCARTA_CCR3_PATHWAY                                                         | 23                       | 1,78                        | 0,004           | 0,032       |
| KEGG_NOTCH_SIGNALING_PATHWAY                                                  | 46                       | 1,78                        | 0,002           | 0,032       |
| KEGG_GRAFT_VERSUS_HOST_DISEASE                                                | 23                       | 1,77                        | 0,002           | 0,032       |
| BIOCARTA_SPPA_PATHWAY                                                         | 21                       | 1,77                        | 0,002           | 0,033       |
| REACTOME_ERK_MAPK_TARGETS                                                     | 21                       | 1,77                        | 0,003           | 0,032       |
| BIOCARTA_MYOSIN_PATHWAY                                                       | 31                       | 1,75                        | 0,002           | 0,037       |
| KEGG_DORSO_VENTRAL_AXIS_FORMATION                                             | 23                       | 1,75                        | 0,003           | 0,038       |
| BIOCARTA_HDAC_PATHWAY                                                         | 28                       | 1,74                        | 0,003           | 0,039       |
| KEGG_GLYCOSAMINOGLYCAN_BIOSYNTHESIS_HEPARAN_SULFATE                           | 25                       | 1,73                        | 0,004           | 0,041       |
| KEGG_LEISHMANIA_INFECTION                                                     | 59                       | 1,72                        | 0,002           | 0,046       |
| KEGG_B_CELL_RECEPTOR_SIGNALING_PATHWAY                                        | 74                       | 1,72                        | 0,0004          | 0,045       |
| REACTOME_THROMBIN_SIGNALING_THROUGH_PROTEINASE_ACTIVATED_RECEPTORS            | 25                       | 1,71                        | 0,006           | 0,047       |
| REACTOME_PLC_BETA_MEDIATED_EVENTS                                             | 38                       | 1,71                        | 0,006           | 0,048       |
| REACTOME_ACTIVATED_TLR4_SIGNALLING                                            | 24                       | 1,71                        | 0,010           | 0,047       |
| BIOCARTA_AT1R_PATHWAY                                                         | 32                       | 1,71                        | 0,005           | 0,047       |
| KEGG_CHEMOKINE_SIGNALING_PATHWAY                                              | 173                      | 1,70                        | <.0001          | 0,048       |
| REACTOME_ACTIVATION_OF_KAINATE_RECEPTORS_UPON_Glutamate_BINDING               | 30                       | 1,69                        | 0,006           | 0,053       |
| KEGG_WNT_SIGNALING_PATHWAY                                                    | 144                      | 1,66                        | 0,001           | 0,067       |
| BIOCARTA_NFKB_PATHWAY                                                         | 22                       | 1,66                        | 0,010           | 0,068       |
| REACTOME_NUCLEAR_EVENTS_KINASE_AND_TRANSCRIPTION_FACTOR_ACTIVATION            | 24                       | 1,65                        | 0,006           | 0,074       |
| BIOCARTA_FCER1_PATHWAY                                                        | 38                       | 1,65                        | 0,010           | 0,072       |
| BIOCARTA_AGR_PATHWAY                                                          | 35                       | 1,65                        | 0,009           | 0,071       |
| KEGG_AXON_GUIDANCE                                                            | 128                      | 1,65                        | 0,001           | 0,072       |
| REACTOME_G_ALPHA_12_13_SIGNALLING_EVENTS                                      | 53                       | 1,65                        | 0,005           | 0,071       |
| BIOCARTA_TOLL_PATHWAY                                                         | 35                       | 1,65                        | 0,006           | 0,070       |
| BIOCARTA_ERK5_PATHWAY                                                         | 17                       | 1,64                        | 0,017           | 0,070       |
| BIOCARTA_NTH1_PATHWAY                                                         | 24                       | 1,64                        | 0,018           | 0,072       |
| KEGG_MELANOGENESIS                                                            | 97                       | 1,64                        | 0,002           | 0,071       |
| KEGG_PHOSPHATIDYLINOSITOL_SIGNALING_SYSTEM                                    | 74                       | 1,64                        | 0,002           | 0,070       |
| REACTOME_CRMP5_IN_SEMA3A_SIGNALING                                            | 16                       | 1,62                        | 0,017           | 0,078       |
| REACTOME_SEMAPHORIN_INTERACTIONS                                              | 65                       | 1,62                        | 0,007           | 0,081       |
| REACTOME_SIGNAL_AMPLIFICATION                                                 | 29                       | 1,61                        | 0,017           | 0,083       |
| ST_WNT_BETA_CATENIN_PATHWAY                                                   | 30                       | 1,61                        | 0,016           | 0,083       |
| BIOCARTA_CDMAC_PATHWAY                                                        | 16                       | 1,61                        | 0,022           | 0,084       |
| REACTOME_TCR_SIGNALING                                                        | 49                       | 1,60                        | 0,009           | 0,088       |
| REACTOME_REGULATION_OF_LIPID_METABOLISM_BY_PEROXISOME_PROLIFERATOR_ACTIVATED_ | 55                       | 1,60                        | 0,008           | 0,091       |
| REACTOME_OPIOID_SIGNALLING                                                    | 81                       | 1,59                        | 0,005           | 0,090       |
| REACTOME_G_PROTEIN_BETA_GAMMA_SIGNALLING                                      | 25                       | 1,59                        | 0,021           | 0,091       |
| REACTOME_AXON_GUIDANCE                                                        | 158                      | 1,59                        | 0,001           | 0,092       |
| BIOCARTA_RARRXR_PATHWAY                                                       | 15                       | 1,58                        | 0,031           | 0,100       |
| BIOCARTA_CD40_PATHWAY                                                         | 15                       | 1,57                        | 0,034           | 0,100       |
| KEGG_GLYCOSAMINOGLYCAN_BIOSYNTHESIS_CHONDROITIN_SULFATE                       | 20                       | 1,57                        | 0,031           | 0,099       |

*continued on the next page*

continued from the previous page

|                                                              |    |      |       |       |
|--------------------------------------------------------------|----|------|-------|-------|
| KEGG_TYPE_I_DIABETES_MELLITUS                                | 29 | 1,57 | 0,018 | 0,098 |
| REACTOME_REGULATION_OF_INSULIN_SECRETION_BY_ACETYLCHOLINE    | 20 | 1,57 | 0,036 | 0,097 |
| REACTOME_MAPK_TARGETS_NUCLEAR_EVENTS_MEDIATED_BY_MAP_KINASES | 30 | 1,57 | 0,019 | 0,098 |
| KEGG_LONG_TERM_DEPRESSION                                    | 66 | 1,57 | 0,011 | 0,099 |

**B) Gene sets enriched in *RUNX1*-wt patients compared to *RUNX1*-mut**

| Gene Set Name                                                         | No. of Genes in Gene Set | Normalized Enrichment Score | Nominal <i>p</i> Value | FDR <i>q</i> Value |
|-----------------------------------------------------------------------|--------------------------|-----------------------------|------------------------|--------------------|
| REACTOME_ACTIVATION_OF_THE_PRE_REPLICATIVE_COMPLEX                    | 29                       | -2,45                       | <.0001                 | <.0001             |
| REACTOME_DNA_REPLICATION_PRE_INITIATION                               | 68                       | -2,44                       | <.0001                 | <.0001             |
| KEGG_DNA_REPLICATION                                                  | 36                       | -2,43                       | <.0001                 | <.0001             |
| REACTOME_DNA_STRAND_ELONGATION                                        | 30                       | -2,38                       | <.0001                 | <.0001             |
| REACTOME_G1_S_TRANSITION                                              | 90                       | -2,33                       | <.0001                 | 0,0002             |
| REACTOME_SYNTHESIS_OF_DNA                                             | 81                       | -2,31                       | <.0001                 | 0,0002             |
| REACTOME_S_PHASE                                                      | 93                       | -2,25                       | <.0001                 | 0,001              |
| REACTOME_MITOTIC_M_M_G1_PHASES                                        | 144                      | -2,19                       | <.0001                 | 0,001              |
| REACTOME_M_G1_TRANSITION                                              | 54                       | -2,17                       | <.0001                 | 0,002              |
| REACTOME_ACTIVATION_OF_ATR_IN_RESPONSE_TO_REPLICATION_STRESS          | 34                       | -2,16                       | <.0001                 | 0,002              |
| REACTOME_E2F_MEDIATED_REGULATION_OF_DNA_REPLICATION                   | 30                       | -2,15                       | <.0001                 | 0,002              |
| REACTOME_EXTENSION_OF_TELOMERES                                       | 28                       | -2,11                       | <.0001                 | 0,003              |
| REACTOME_E2F_TRANSCRIPTIONAL_TARGETS_AT_G1_S                          | 19                       | -2,11                       | 0,001                  | 0,003              |
| REACTOME_G2_M_CHECKPOINTS                                             | 39                       | -2,09                       | <.0001                 | 0,003              |
| REACTOME_LAGGING_STRAND_SYNTHESIS                                     | 20                       | -2,07                       | 0,001                  | 0,004              |
| REACTOME_REPAIR_SYNTHESIS_OF_PATCH_27_30_BASES_LONG_BY_DNA_POLYMERASE | 15                       | -2,02                       | 0,003                  | 0,007              |
| KEGG_CELL_CYCLE                                                       | 115                      | -2,02                       | <.0001                 | 0,007              |
| REACTOME_ORC1_REMOVAL_FROM_CHROMATIN                                  | 56                       | -1,99                       | <.0001                 | 0,008              |
| BIOCARTA_MCM_PATHWAY                                                  | 18                       | -1,99                       | <.0001                 | 0,007              |
| REACTOME_TRANSCRIPTION_COUPLED_NER                                    | 38                       | -1,99                       | 0,001                  | 0,007              |
| REACTOME_CELL_CYCLE_CHECKPOINTS                                       | 97                       | -1,98                       | <.0001                 | 0,008              |
| KEGG_NUCLEOTIDE_EXCISION_REPAIR                                       | 40                       | -1,93                       | 0,002                  | 0,012              |
| KEGG_BASE_EXCISION_REPAIR                                             | 31                       | -1,92                       | 0,002                  | 0,013              |
| KEGG_MISMATCH_REPAIR                                                  | 22                       | -1,87                       | 0,003                  | 0,021              |
| REACTOME_ELECTRON_TRANSPORT_CHAIN                                     | 57                       | -1,87                       | <.0001                 | 0,021              |
| REACTOME_GLUCOSE_TRANSPORT                                            | 38                       | -1,86                       | 0,002                  | 0,022              |
| KEGG_PORPHYRIN_AND_CHLOROPHYLL_METABOLISM                             | 28                       | -1,86                       | 0,003                  | 0,021              |
| REACTOME_CDT1_ASSOCIATION_WITH_THE_CDC6_ORC_ORIGIN_COMPLEX            | 45                       | -1,84                       | 0,001                  | 0,023              |
| BIOCARTA_MITOCHONDRIA_PATHWAY                                         | 21                       | -1,77                       | 0,010                  | 0,042              |
| REACTOME_GLOBAL_GENOMIC_NER                                           | 30                       | -1,77                       | 0,003                  | 0,042              |
| REACTOME_MITOTIC_PROMETAPHASE                                         | 86                       | -1,77                       | 0,001                  | 0,041              |
| REACTOME_NUCLEOTIDE_EXCISION_REPAIR                                   | 43                       | -1,75                       | 0,001                  | 0,048              |
| KEGG_GLYCINE_SERINE_AND_THREONINE_METABOLISM                          | 31                       | -1,74                       | 0,003                  | 0,047              |
| REACTOME_METABOLISM_OF_CARBOHYDRATES                                  | 113                      | -1,74                       | <.0001                 | 0,048              |
| REACTOME_REGULATION_OF_APC_ACTIVATORS_BETWEEN_G1_S_AND_EARLY_ANAPHASE | 61                       | -1,72                       | 0,001                  | 0,055              |
| KEGG_TYROSINE_METABOLISM                                              | 38                       | -1,70                       | 0,007                  | 0,062              |
| REACTOME_TRANSPORT_OF_THE_SLBP_INDEPENDENT_MATURE_MRNA                | 31                       | -1,69                       | 0,007                  | 0,066              |
| REACTOME_REGULATION_OF_ORNITHINE_DECARBOXYLASE                        | 40                       | -1,69                       | 0,007                  | 0,064              |
| REACTOME_INFLUENZA_LIFE_CYCLE                                         | 85                       | -1,66                       | <.0001                 | 0,076              |
| REACTOME_TAT_MEDIATED_HIV1_ELONGATION_ARREST_AND_RECOVERY             | 27                       | -1,66                       | 0,011                  | 0,077              |
| REACTOME_LATE_PHASE_OF_HIV_LIFE_CYCLE                                 | 82                       | -1,65                       | 0,001                  | 0,077              |
| REACTOME_REGULATION_OF_GLUCOKINASE_BY_GLUCOKINASE_REGULATORY_PROTEIN  | 29                       | -1,65                       | 0,011                  | 0,078              |
| REACTOME_SCF_SKP2_MEDIATED_DEGRADATION_OF_P27_P21                     | 44                       | -1,65                       | 0,006                  | 0,077              |
| REACTOME_HIV_LIFE_CYCLE                                               | 94                       | -1,63                       | 0,003                  | 0,086              |
| REACTOME_GLYCOLYSIS                                                   | 21                       | -1,63                       | 0,023                  | 0,084              |
| REACTOME_P53_INDEPENDENT_DNA_DAMAGE_RESPONSE                          | 36                       | -1,62                       | 0,011                  | 0,087              |
| REACTOME_MTOR_SIGNALLING                                              | 25                       | -1,61                       | 0,014                  | 0,089              |
| REACTOME_CDC20_PHOSPHO_APC_MEDIATED_DEGRADATION_OF_CYCLIN_A           | 53                       | -1,61                       | 0,003                  | 0,088              |
| KEGG_RNA_POLYMERASE                                                   | 26                       | -1,60                       | 0,019                  | 0,093              |
| REACTOME_HIV1_TRANSCRIPTION_ELONGATION                                | 35                       | -1,60                       | 0,015                  | 0,095              |
| REACTOME_ABORTIVE_ELONGATION_OF_HIV1_TRANSCRIPT_IN_THE_ABSENCE_OF_TAT | 21                       | -1,59                       | 0,026                  | 0,099              |
| REACTOME_VPR_MEDIATED_NUCLEAR_IMPORT_OF_PICS                          | 31                       | -1,58                       | 0,015                  | 0,098              |
| KEGG_PHENYLALANINE_METABOLISM                                         | 18                       | -1,58                       | 0,032                  | 0,097              |
| REACTOME_IRS_RELATED_EVENTS                                           | 75                       | -1,58                       | 0,004                  | 0,096              |
| REACTOME_CYCLIN_E_ASSOCIATED_EVENTS_DURING_G1_S_TRANSITION            | 49                       | -1,58                       | 0,011                  | 0,097              |
| REACTOME_GLUCOSE_REGULATION_OF_INSULIN_SECRETION                      | 135                      | -1,58                       | 0,000                  | 0,096              |
| REACTOME_FRS2MEDIATED_CASCADE                                         | 25                       | -1,56                       | 0,027                  | 0,100              |

Online Supplementary Figure S1. Enrichment of gene sets differentially expressed between *RUNX1*-mutated and *RUNX1*-wild-type patients.

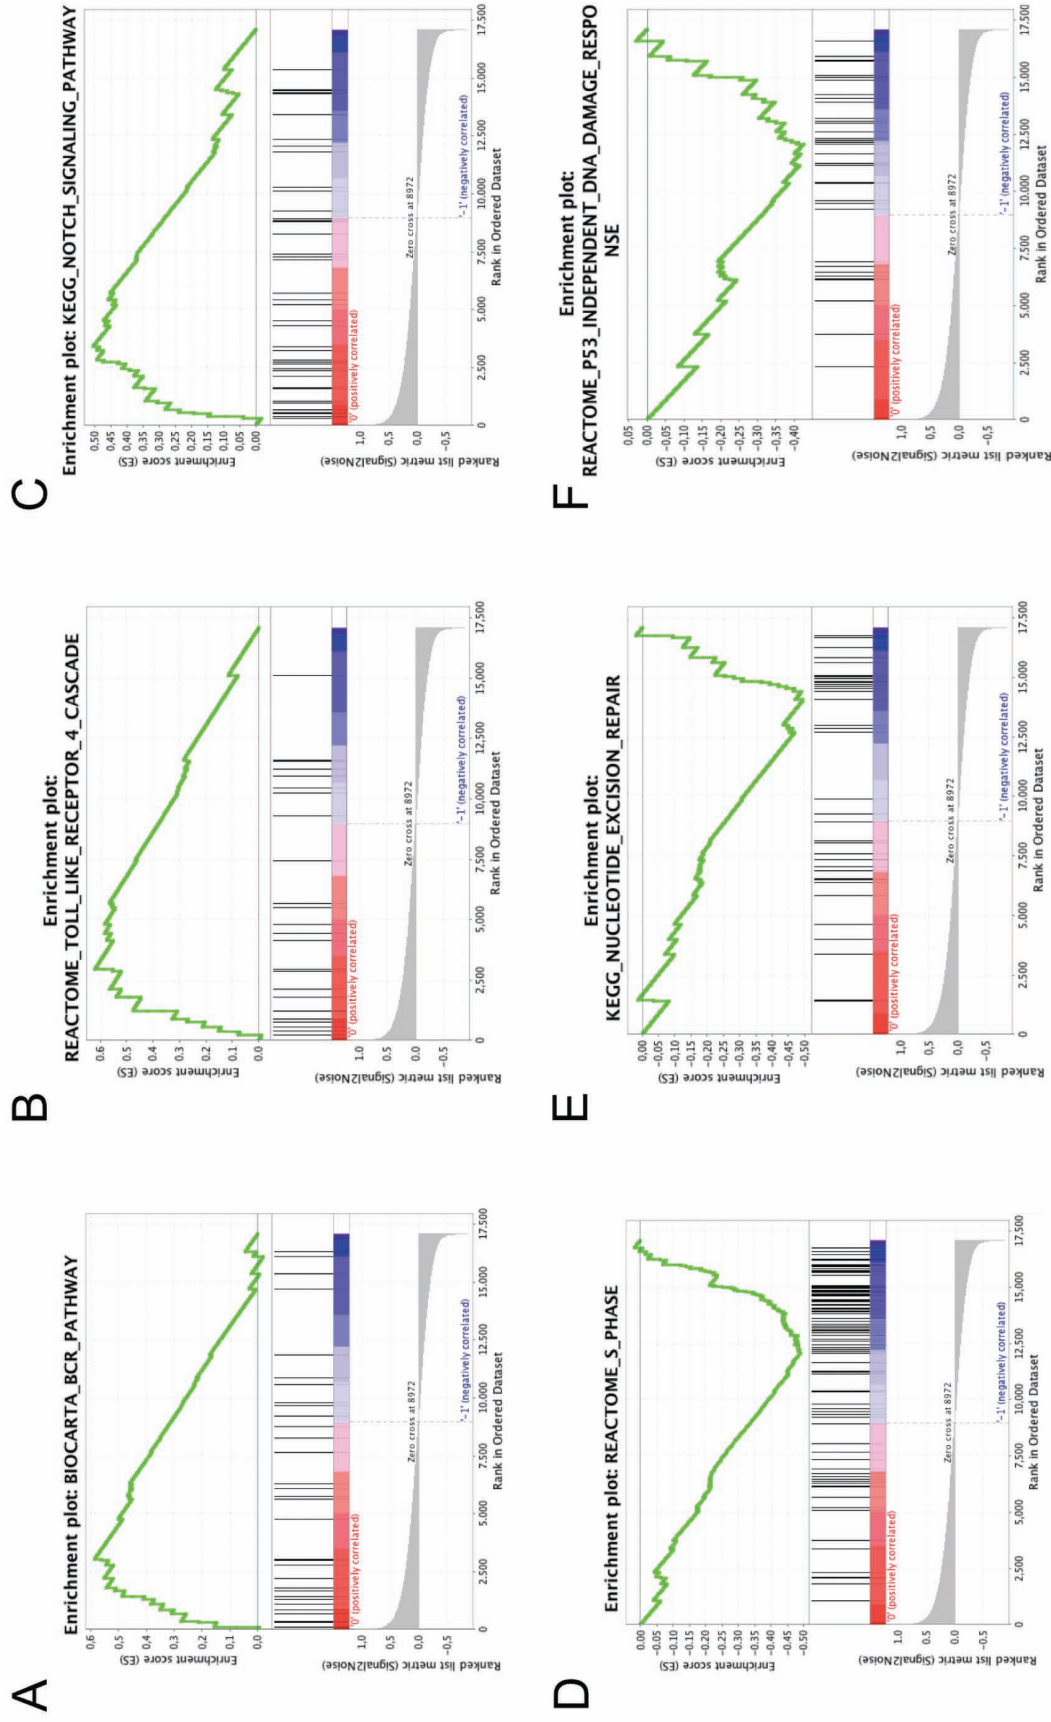

Supplement: supp_2012.064667_2012.064667.GREIF_SUPPL.pdf [file supp_2012.064667_2012.064667.GREIF_SUPPL.pdf]
