# Supplementary material
Source: PubMed Central journal article supplement (PMC3590097)
Supplement: supp_2012.064667_2012_064667-Contributions.pdf [file supp_2012.064667_2012_064667-Contributions.pdf]

**Manuscript no. HAEMATOL/2012/064667 entitled “RUNX1 mutations in cytogenetically normal acute myeloid leukemia are associated with a poor prognosis and up-regulation of lymphoid genes“**

**Authors: Philipp A. Greif, Nikola P. Konstandin, Klaus H. Metzeler, Tobias Herold, Zlatana Pasalic, Bianka Ksienzyk, Annika Dufour, Friederike Schneider, Stephanie Schneider, Purvi M. Kakadia, Jan Braess, Maria Cristina Sauerland, Wolfgang E. Berdel, Thomas Büchner, Bernhard J. Woermann, Wolfgang Hiddemann, Karsten Spiekermann, and Stefan K. Bohlander**

**Information about the contributions of each person named as having participated in the study**

- 1) Guarantor(s)**, i.e., person(s) who is (are) responsible for the integrity of the work as a whole:
- Philipp A. Greif, Department of Internal Medicine 3, LMU-Munich, pgreif@med.uni-muenchen.de
  - Stefan K. Bohlander, Center for Human Genetics, Philipps-University-Marburg, bohlander@helmholtz-muenchen.de

According to the International Committee of Medical Journal Editors (ICMJE) ([http://www.icmje.org/ethical\\_1author.html](http://www.icmje.org/ethical_1author.html)): “*Authorship credit should be based on: 1) substantial contributions to conception and design, acquisition of data, or analysis and interpretation of data; 2) drafting the article or revising it critically for important intellectual content; and 3) final approval of the version to be published. Authors should meet conditions 1, 2, and 3 ..... Acquisition of funding, collection of data, or general supervision of the research group alone does not constitute authorship*”.

**The guarantors of this manuscript confirm that all persons designated as authors qualify for authorship, and that each author has participated sufficiently in the work to take public responsibility for appropriate portions of the content.**

**2) Authors who participated in the conception of the study:** Philipp A. Greif, Stefan K. Bohlander, Tobias Herold, Klaus Metzeler, Karsten Spiekermann

**3) Design & Methods.** The following authors were responsible for specific investigations (please detail):

- Nikola Konstandin and Philipp Greif were responsible for mutation screening and analysis
- Klaus Metzeler, Zlatana Pasalic and Tobias Herold were responsible for gene expression analysis
- Tobias Herold was responsible for analysis of the clinical data
- Bianka Ksienzyk, Annika Dufour, Friederike Schneider, Stephanie Schneider, Purvi M. Kakadia, Jan Braess, Stefan Bohlander and Karsten Spiekermann characterized patient samples
- Maria Cristina Sauerland, Wolfgang E. Berdel, Thomas Büchner, Bernhard J. Woermann and Wolfgang Hiddemann organized the clinical trial.

**4) Results.** The following authors were responsible for specific portions of the results, including figures and tables (please indicate the person responsible for each figure and each table):

- Nikola Konstandin and Philipp Greif were responsible for Table 1 and Figure 1 A
- Nikola Konstandin and Tobias Herold were responsible for Figure 1 B
- Tobias Herold was responsible for Figure 2, Table 2 and Table 3
- Klaus Metzeler was responsible for Figure 3
- Nikola Konstandin was responsible for Table S1
- Klaus Metzeler was responsible for Table S2, Table S3 and Figure S1

5) **Writing the manuscript.** The following authors were responsible for writing the manuscript:

- Philipp Greif and Stefan Bohlander were responsible for the Introduction
- Philipp Greif, Nikola Konstandin, Tobias Herold, Klaus Metzeler and Stefan Bohlander were responsible for the Results
- Philipp Greif, Tobias Herold, Klaus Metzeler and Stefan Bohlander were responsible for the Discussion

6) **Contributors Listed in Acknowledgments:** not applicable
